# Supplementary material for: Sustained Hyperglycemia and Its Relationship with the Outcome of Hospitalized Patients with Severe COVID-19: Potential Role of ACE2 Upregulation
Source: MDPI journal article supplement (doi:10.3390/jpm12050805), 2022-05-17
Supplement: s1 [file s1]

- *Supplementary material* -

# Sustained Hyperglycemia and Its Relationship With the Outcome of Hospitalized Patients With Severe COVID-19: Potential Role of ACE2 Upregulation

Jose R. Vargas-Rodriguez <sup>1</sup>, José J. Valdés Aguayo <sup>1</sup>, Idalia Garza-Veloz <sup>1</sup>, Jacqueline Martinez-Rendon <sup>1</sup>, Maria del Refugio Rocha Pizaña <sup>2</sup>, Griselda A. Cabral-Pacheco <sup>1</sup>, Vladimir Juárez-Alcalá <sup>1</sup>, and Margarita L Martinez-Fierro <sup>1,\*</sup>.

<sup>1</sup> Molecular Medicine Laboratory, Unidad Academica de Medicina Humana y C.S, Campus UAZ siglo XXI-L1, 98160, Universidad Autónoma de Zacatecas, Zacatecas, Mexico. jrvr159@gmail.com (J.R.V.-R.); josejuan104@gmail.com (J.J.V.-A.); [idaliaqv@uaz.edu.mx](mailto:idaliaqv@uaz.edu.mx) (I.G.-V.); jamare85@gmail.com (J.M.-R.); gris91.edia@gmail.com (G.A.C.-P.); vladimir.j.a@uaz.edu.mx (V.J.-A.).

<sup>2</sup> Escuela de Ingenieria y Ciencias, Tecnologico de Monterrey Campus Puebla, 72453, Puebla, México; mrochap@tec.mx.

\* Correspondence to: Margarita L Martinez-Fierro. [margaritamf@uaz.edu.mx](mailto:margaritamf@uaz.edu.mx); Tel.: +52 (492) 9256690 Ext: 4535.

Figure S1

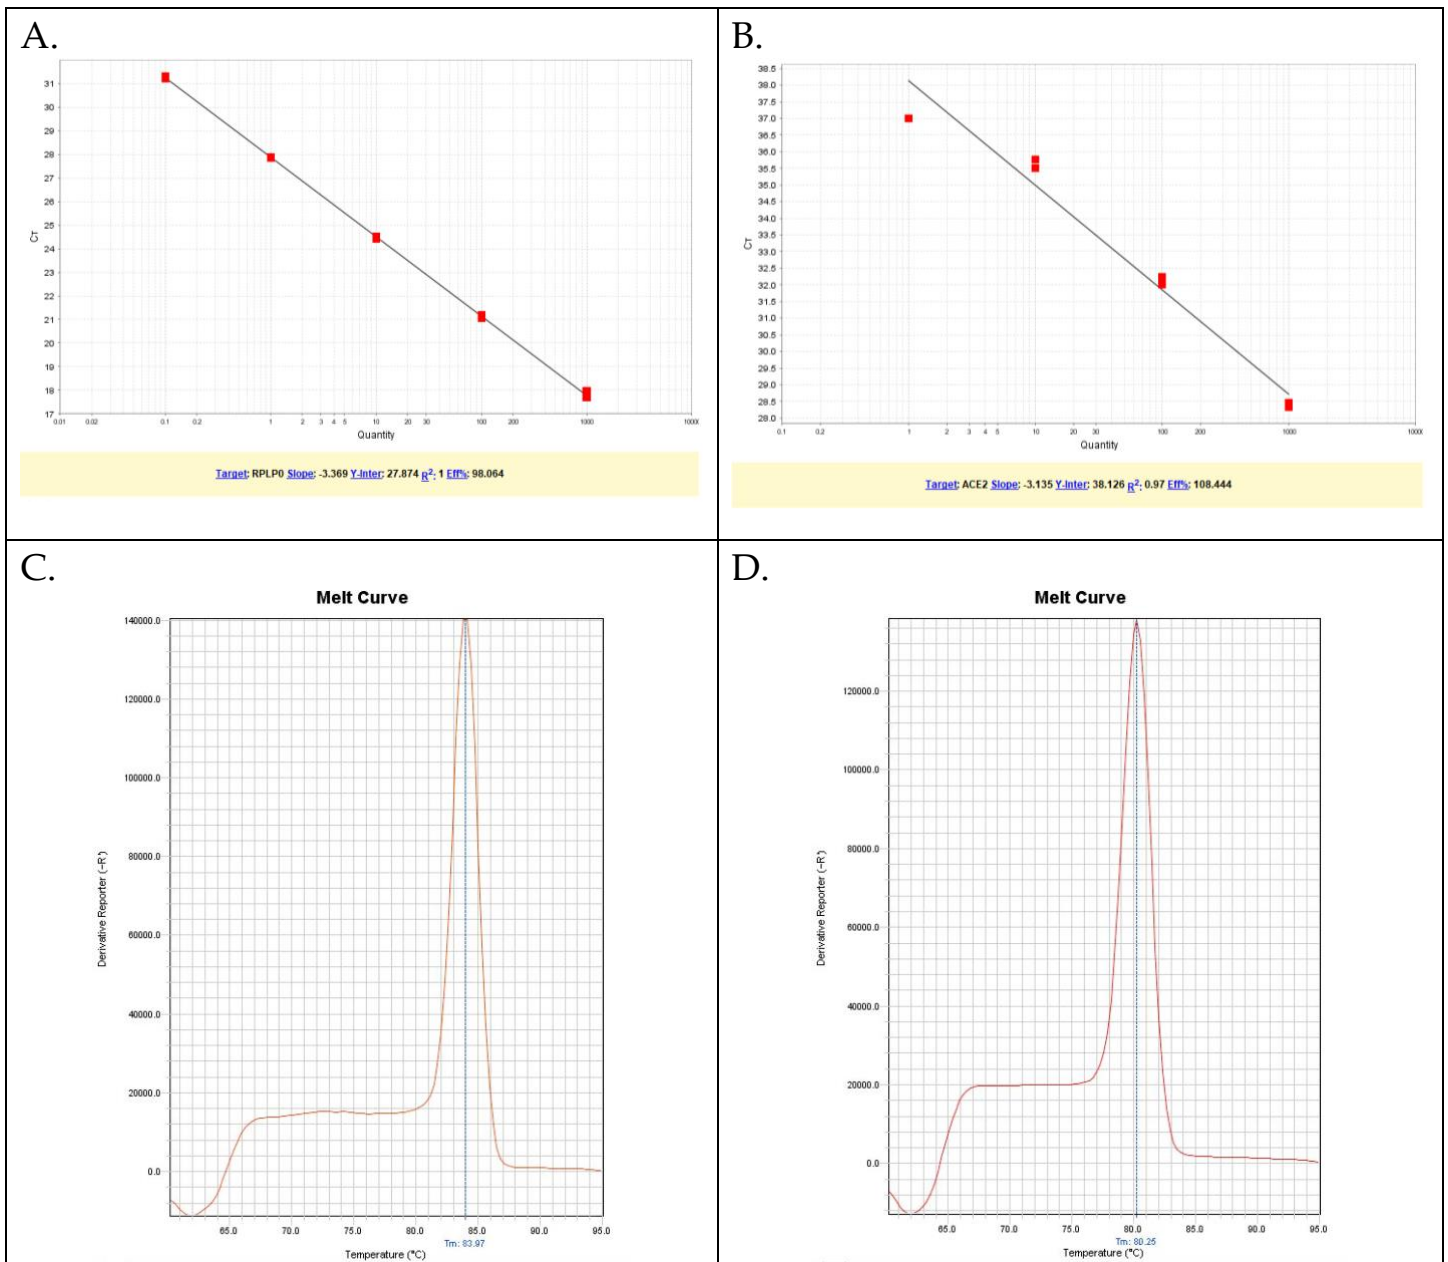

**Figure S1.** Standard and melt curves for *ACE2* and *RLP0*. Standard and melt curves were constructed both for *RLP0* (A–C) and *ACE2*. Standard curves were constructed using logarithmic cDNA concentrations in a range of 1000 ng to 0.01 ng. The efficiency and R<sup>2</sup> calculated values for *RLP0* were 98.06% and 1; whereas that for *ACE2* these values were 108.4% and 0.97, respectively. The temperatures for the melt curves were 83.97 for *RLP0* (C) and 80.25 for *ACE2* (D).
